1 **KDM2B is a histone H3K79 demethylase and induces**  
2 **transcriptional repression via SIRT1-mediated chromatin silencing**

3

4 Joo-Young Kang<sup>1</sup>, Ji-Young Kim<sup>1</sup>, Kee-Beom Kim<sup>1</sup>, Jin Woo Park<sup>1</sup>, Hana Cho<sup>1</sup>, Ja Young Hahm<sup>1</sup>,  
5 Yun-Cheol Chae<sup>1</sup>, Daehwan Kim<sup>1</sup>, Hyun Kook<sup>2</sup>, Sangmyung Rhee<sup>1</sup>, Nam-Chul Ha<sup>3</sup>, Sang-Beom Seo<sup>1\*</sup>

6

7 <sup>1</sup>Department of Life Science, College of Natural Sciences, Chung-Ang University, Seoul 156-756,  
8 Republic of Korea

9 <sup>2</sup>Medical Research Center for Gene Regulation and Department of Pharmacology, Chonnam National  
10 University, Gwangju 501-746, Republic of Korea

11 <sup>3</sup>Department of Food and Animal Biotechnology, Department of Agricultural Biotechnology, Seoul  
12 National University, Seoul 151-921, Republic of Korea

13 \*For correspondence: sangbs@cau.ac.kr

14

15 **Abstract**

16 The methylation of histone H3 lysine 79 (H3K79) is an active chromatin marker and is prominent in  
17 actively transcribed regions of the genome. However, demethylase of H3K79 remains unknown  
18 despite intensive research. Here, we show that KDM2B (also known as FBXL10), a member of the  
19 Jumonji C family of proteins and known for its histone H3K36 demethylase activity, is a di- and tri-  
20 methyl H3K79 demethylase. We demonstrate that KDM2B induces transcriptional repression of  
21 *HOXA7* and *MEIS1* via occupancy of promoters and demethylation of H3K79. Furthermore, genome-  
22 wide analysis suggests that H3K79 methylation levels increase when KDM2B is depleted, indicating  
23 that KDM2B functions as an H3K79 demethylase *in vivo*. Finally, stable KDM2B-knockdown cell lines  
24 exhibit displacement of NAD<sup>+</sup>-dependent deacetylase SIRT1 from chromatin, with concomitant  
25 increases in H3K79 methylation and H4K16 acetylation. Our findings identify KDM2B as an H3K79  
26 demethylase and link its function to transcriptional repression via SIRT1-mediated chromatin silencing.

## 27 **Introduction**

28 Chromatin structure is modulated by diverse covalent histone modifications (Cheung et al., 2000;  
29 Strahl and Allis, 2000) Combinations of such modifications direct both global and specific  
30 transcriptional outcomes (Berger, 2007; Lee et al., 2010). Among these modifications, histone lysine  
31 methylation is linked to both activation and repression of transcription. As in the case of most  
32 epigenetic modifications, histone methylation and demethylation are dynamically regulated by histone  
33 methyltransferases (HMTases) and demethylases (Martin and Zhang, 2005; Mosammaparast and Shi,  
34 2010; Wysocka et al., 2005).

35 Histone H3 lysine 79 methylation (H3K79me) is catalyzed by the HMTase disruptor of telomeric  
36 silencing-1 (Dot1)-Like (DOT1L), which is the mammalian homolog of the yeast Dot1 (Feng et al.,  
37 2002; Lacoste et al., 2002; Singer et al., 1998; van Leeuwen et al., 2002). DOT1L is considered the  
38 only H3K79 HMTase in mammals. However, recent reports suggest that the nuclear SET (Su(var)3-9,  
39 Enhancer-of-zeste, Trithorax) domain (NSD) family of HMTases, including response element II binding  
40 protein (RE-IIBP) (also known as NSD2), has H3K79-methylating activities (Morishita et al., 2014;  
41 Woo Park et al., 2015). On the basis of analyses of its crystal structure, H3K79 is a surface-exposed  
42 residue and is located in close proximity to lysine 123 of histone H2B in yeast cells (Luger et al., 1997;  
43 Ng et al., 2002b). Regulation occurs by trans-crosstalk, and ubiquitylation of histone H2BK123  
44 (H2BK123ub) is necessary for H3K79me formation (Briggs et al., 2002).

45 H3K79 methylation is linked to active gene transcription (Ng et al., 2003; Okada et al., 2005;  
46 Okada et al., 2006; Schubeler et al., 2004; Vakoc et al., 2006). In addition, H2BK123ub, H3K4me,  
47 H3K79me, and RNA polymerase II (Pol II) phosphorylation occurs sequentially during transcriptional  
48 elongation (Nguyen and Zhang, 2011). H3K79me plays a role in DNA repair through interaction with  
49 Rad9/53BP1, and the levels of H3K79me change during the cell cycle (Feng et al., 2002; Huyen et al.,  
50 2004; Schulze et al., 2009; Wysocki et al., 2005). During embryogenesis, H3K79me regulates the  
51 expression of developmental genes (Ooga et al., 2008; Shanower et al., 2005). In addition, aberrant  
52 hypermethylation of H3K79 results in the activation of oncogenes and leukemic transformation (Bernt  
53 et al., 2011; Bitoun et al., 2007; Mueller et al., 2007).

54 The Jumonji C (JmjC) domain-containing histone demethylase, KDM2B, also known as FBXL10,

55 preferentially demethylates both H3K36me<sub>2/3</sub> and H3K4me<sub>3</sub> (Frescas et al., 2007; Tsukada et al.,  
56 2006; Wang et al., 2011). KDM2B also mediates the monoubiquitylation of the histone H2AK119 as a  
57 component of noncanonical polycomb-repressive complex 1 (PRC1) in embryonic stem cells (ESCs)  
58 (Farcas et al., 2012; Wu et al., 2013). KDM2B enhances reprogramming of ES cells via its binding to  
59 unmethylated CpG sites through the zinc finger (ZF)-CXXC motif. CpG recognition and PRC1  
60 targeting by KDM2B are important for the deposition of H2AK119ub1 and for further recruitment of  
61 PRC2 to a subset of CpG islands, which is an activity limited to variant PRC1 complexes (Blackledge  
62 et al., 2014; He et al., 2013; Liang et al., 2012).

63 KDM2B contributes to the development of tumors *in vivo*, probably via H3K36 demethylase activity.  
64 Overexpression of KDM2B inhibits cellular senescence by repressing the mouse loci p16Ink4a,  
65 p19Arf, and p15Ink4b, and by repressing the human loci retinoblastoma (Rb) and p53, resulting in  
66 cellular immortalization (Pfau et al., 2008; Tzatsos et al., 2009). In addition, wild-type KDM2B but not  
67 a mutant with defective demethylase activity enhances the progression of pancreatic cancer in a  
68 mouse model (Tzatsos et al., 2013). Furthermore, H3K36 demethylase activity is required for  
69 leukemic transformation in a Hoxa9/Meis1-induced mouse bone marrow transplantation (BMT) model  
70 (He et al., 2011).

71 In this study, we identified KDM2B as a histone demethylase that can catalyze the removal of di-  
72 and tri-methyl groups from the H3K79 lysine residue. We also found that KDM2B induces SIRT1-  
73 mediated chromatin silencing by removing H3K79me, which leads to transcriptional repression.

74

## 75 **Results**

### 76 **Identification of the H3K79me<sub>2</sub> peptide-interacting proteins**

77 In an attempt to identify a potential H3K79 demethylase, we hypothesized an interaction between  
78 H3K79me site and a corresponding demethylase or a certain complex with H3K79 demethylase  
79 activity. This hypothesis led us to perform a peptide pull-down assay using H3K79me<sub>2</sub> peptides with  
80 K562 nuclear extracts. By liquid chromatography-tandem mass spectrometry (LC-MS/MS), we  
81 showed that methylated H3K79 was associated with chromobox homolog 8 (CBX8), one of the

82 various types of CBX proteins directing the canonical PRC1 complex as an interacting component  
83 (Figure 1A and B). To rule out the possibility of non-specific binding, we carried out pull-down assays  
84 between CBX8 and H3K79me0 peptides as negative controls, and confirmed that CBX8 interacted  
85 with H3K79me2 peptides but not with H3K79me0 peptides (Figure 1C). PRC1, one of the polycomb  
86 group (PcG) multiprotein complexes, has a diverse composition that depends on the presence or  
87 absence of CBX proteins (Di Croce and Helin, 2013; Gil and O'Loughlen, 2014). Previous studies  
88 isolated nuclear proteins bound to KDM2B and identified the BCL6 co-repressor (BCOR) complex by  
89 mass spectrometry (Sanchez et al., 2007). Another studies identified the presence of the KDM2B-  
90 containing non-canonical PRC1-BCOR-CBX8 complex (Beguelin et al., 2016; Sanchez et al., 2007).  
91 To investigate the associations of these proteins, we performed immunoprecipitation (IP) experiments  
92 and showed that KDM2B bound CBX8 (Figure 1D). On the basis of these results, we suggest that  
93 CBX8 is associated with KDM2B in a certain complex and that KDM2B possibly functions at the  
94 H3K79me site.

95

#### 96 **KDM2B demethylates H3 di-/tri-methyl-K79 *in vitro* and *in vivo***

97 In addition to being a subunit of the non-canonical PRC1 complex, KDM2B is the only known  
98 demethylase involved in other types of complexes containing CBX8, including the BCOR complexes.  
99 Therefore, we decided to test the H3K79 demethylation activity of KDM2B (Figure 2-figure  
100 supplement 1A). Ectopic expression of FLAG-tagged full-length KDM2B in 293T cells markedly  
101 reduced the levels of H3K79me3 and, to a lesser degree, reduced the levels of H3K79me2. No  
102 decreases in H3K79me1 levels were observed (Figure 2A, left panel). As expected, KDM2B also  
103 decreased the levels of H3K36me2. However, a mutant form with a substitution of histidine with  
104 alanine in the JmjC domain catalytically deficient in H3K36 demethylase activity, KDM2B-H242A,  
105 failed to demethylate H3K79me3, H3K79me2, and H3K79me1 (Figure 2A, left panel). We observed  
106 that DOT1L rescued the effects of KDM2B on H3K79 but not on H3K36, which confirmed the H3K79  
107 demethylase activity of KDM2B (Figure 2-figure supplement 1B).

108 We next investigated the H3K79 demethylation at the global level by comparing methylation status

109 in stable KDM2B knockdown 293T cells. We used two independent shRNAs targeting different  
110 regions of KDM2B: one in the coding sequence (CDS) and the other in the 3'-untranslated region  
111 (UTR). We found that RNA interference (RNAi) of endogenous KDM2B led to increased H3K79me3  
112 and H3K79me2 levels, but mono-methylation was not affected (Figure 2A, right panel). Furthermore,  
113 immunocytochemistry showed that overexpression of KDM2B in 293T cells resulted in a loss of  
114 H3K79me3, in contrast with the strong H3K79me3 staining signals observed in adjacent non-  
115 transfected cells (Figure 2B). However, overexpression of KDM2B had no detectable effect on  
116 H3K79me1 levels that were determined by immunocytochemistry (Figure 2B).

117 We confirmed the H3K79 demethylase activity of KDM2B through *in vitro* assays. It was necessary  
118 to decide whether the above observations derived from indirect effects of genetic manipulation or from  
119 the direct enzymatic activity of KDM2B. After incubation of core histones with increasing  
120 concentrations of GST-KDM2B containing the JmjC, CXXC, and plant homeodomain (PHD) domains  
121 (amino acids 1–734), we observed reduced levels of H3K79me2 and of H3K79me3 (Figure 2C, left  
122 panel). We examined the effects of KDM2B on nucleosomes. Similar to the effects on core histones,  
123 KDM2B demethylated both H3K79me2 and H3K79me3 of nucleosomes (Figure 2C, right panel). We  
124 concluded that KDM2B had H3K79 demethylase activity both *in vitro* and *in vivo*. We performed  
125 isothermal titration calorimetry (ITC) experiments to test binding affinity of KDM2B towards tri-  
126 methylated H3K79 peptides. Given that H3K79me3 had a much lower dissociation constant (K<sub>d</sub>) than  
127 H3K79me<sub>0</sub>, GST-KDM2B<sub>1–734</sub> bound to H3K79me3 with stronger affinity (Figure 2-figure supplement  
128 2A). To demonstrate the specificity toward H3K79, we assessed whether KDM2B removes the methyl  
129 groups from recombinant histone H3 with methyl-lysine analogs (MLAs) which was specifically  
130 methylated by chemical alkylation reaction (Jia et al., 2009; Simon et al., 2007), using formaldehyde  
131 dehydrogenase (FDH) assays. FDH assay measures the production of formaldehyde, a by-product  
132 derived from demethylation reaction, by monitoring the reduction of nicotinamide adenine dinucleotide  
133 (NAD<sup>+</sup>) into NADH (Lizcano et al., 2000; Shi et al., 2004). We used fluorescence-based detection  
134 method and assessed demethylase activity of KDM2B. It was observed that KDM2B effectively  
135 produced marked amounts of formaldehyde from MLA histone H3 containing tri-methylation on K<sub>79</sub>,  
136 confirming that H3K79 is a substrate for demethylation catalyzed by KDM2B (Figure 2D). The FDH

137 assay system also worked for MLA histone H3K<sub>c</sub>36me<sub>2</sub> as a substrate (Figure 2-figure supplement  
138 2B). Furthermore, we performed *in vitro* histone demethylase assays and LC-MS/MS analysis with  
139 MLA histone H3K<sub>c</sub>79me<sub>3</sub>. Incubation with GST-KDM2B<sub>1-734</sub> led to demethylation of MLA histone  
140 H3K<sub>c</sub>79me<sub>3</sub> and to increase of H3K<sub>c</sub>79me<sub>1</sub> level (Figure 2-figure supplement 2C). Western blot  
141 analysis of MLA histone H3K<sub>c</sub>79me<sub>3</sub> incubated with GST-KDM2B<sub>1-734</sub> confirmed a marked decrease  
142 in H3K79me<sub>3</sub> level (data not shown). These results indicate that KDM2B is an H3K79me<sub>2/3</sub>-specific  
143 demethylase.

144

#### 145 **Structural analysis of H3K79 demethylation by KDM2B**

146 To obtain insights into the mechanism of the demethylation reaction, we modeled H3K79 onto the  
147 KDM2B structure, based on the H3K36-bound KDM2A structure that was previously determined  
148 (Cheng et al., 2014). Given that the location of H3K79 within the protein structure is in the loop  
149 between the two alpha-helices, this region could be accessible to the active site of KDM2B with a  
150 slight conformational change. Remarkably, the sequences around the K79 and K36 of histone H3 are  
151 similar in their chemical properties. In accordance with the sequence alignment of residues  
152 surrounding the H3K79 and H3K36 (Figure 3A), this modeling exercise indicated that the hydrophobic  
153 residues in the H3K79 peptide (Phe78, Leu82, and Phe84) are involved in hydrophobic interactions  
154 with KDM2B. This is similar to what occurs in the interactions of the H3K36 peptide with the complex  
155 structure of KDM2A (Figure 3B). The residues (His242 and His314) for binding of iron and alpha-  
156 ketoglutarate ( $\alpha$ -KG) were also conserved in the modeled structure (Figure 3B), indicating  
157 concomitant bindings of these co-factors with the H3K79 peptide. Together, these findings indicate  
158 that H3K79 is a plausible demethylation site for KDM2B.

159 We also verified the H3K79 demethylase activity of KDM2B, using core histone substrates  
160 radiolabeled by DOT1L (which is responsible for methylation at K79 sites). KDM2B significantly  
161 decreased the levels of H3K79-methylated histones (Figure 3C). In addition, since KDM2B was well  
162 known as H3K36 and H3K4 demethylase (Frescas et al., 2007; Tsukada et al., 2006; Wang et al.,

163 2011), we compared the activities of KDM2B between H3K79, H3K36, and H3K4, using <sup>14</sup>C-labeled  
164 histones by DOT1L, multiple myeloma set domain (MMSET), and SET and MYND domain containing  
165 protein 3 (SMYD3), respectively (Figure 3-figure supplement 1). We detected considerable reductions  
166 in radioactivity of each histone substrate following demethylation by KDM2B (Figure 3D). Therefore,  
167 these findings suggest that H3K79 demethylase activity of KDM2B is catalytically effective based on  
168 the degrees of H3K36 and H3K4 demethylation.

169

### 170 **KDM2B induces transcriptional repression**

171 Since H3K79me was involved in transcriptional activation (Ng et al., 2003; Okada et al., 2005; Okada  
172 et al., 2006; Schubeler et al., 2004; Vakoc et al., 2006), we speculated that demethylation of the site  
173 by KDM2B might induce transcriptional repression. To elucidate the effects of KDM2B on target gene  
174 expression, we first tested whether KDM2B specifically downregulated transcription of the two best-  
175 studied mixed lineage leukemia (MLL) fusion target loci, the *HOXA7* and *MEIS1*, preferentially  
176 regulated by changes in H3K79me level. Luciferase reporter assays showed that KDM2B  
177 overexpression resulted in *HOXA7* and *MEIS1* transcriptional downregulation, and, conversely,  
178 KDM2B knockdown resulted in their upregulation (Figure 4A). These results are consistent with the  
179 previously examined repressive function of KDM2B. To show whether the enzymatic activity of  
180 KDM2B was required for the repressive function of the protein, the catalytically inactive mutant  
181 (H242A) and  $\Delta$ CXXC mutant were tested in reporter assays using the *HOXA7* promoter. A significant  
182 absence of transcriptional repression was observed in assays using the  $\Delta$ CXXC mutant, and partial  
183 repression was observed in assays using the H242A point mutant (Figure 4B). To examine whether  
184 the demethylation of H3K79 catalyzed by KDM2B led to downregulation of general transcription, we  
185 carried out luciferase assays using simian virus 40 (SV40) and thymidine kinase (TK) promoters.  
186 Transient overexpression of KDM2B repressed luciferase activity on both promoters, whereas KDM2B  
187 depletion resulted in transcriptional activation (Figure 4-figure supplement 1A). We next investigated  
188 whether transcriptional activities of KDM2B and DOT1L were in opposite direction through the

189 regulation of H3K79me. Knockdown of DOT1L recapitulated KDM2B-mediated transcriptional  
190 repression on the same two promoters (data not shown).

191 Based on published data, we selected four genes from approximately 2,500 genes directly  
192 targeted by KDM2B. *HOXA7*, *MEIS1*, *ALX1*, and *GATA4* have been reported as KDM2B and PcG  
193 target genes by chromatin immunoprecipitation (ChIP)-sequencing (seq) and ChIP analyses using  
194 mouse ESCs (Blackledge et al., 2014; Bracken et al., 2006; Farcas et al., 2012; Wu et al., 2013).  
195 Using these four known target genes, we demonstrated that H3K79 demethylation alone, without  
196 H3K36 or H3K4 demethylation, was involved in KDM2B-mediated repression. We measured the  
197 transcription levels of the four target genes using wild-type and K4/36R mutant histone H3. As  
198 expected, these four genes showed clear downregulation in H3 K4/36R-overexpressing stable cells,  
199 similar to their levels in H3 wild-type-overexpressing stable cells when KDM2B was ectopically  
200 expressed (Figure 4C). Taken together, we established that H3K79 demethylation is indeed required  
201 for KDM2B-mediated repression in addition to H3K36 and H3K4 demethylations.

202

### 203 **KDM2B depletion regulates gene expression through genome-wide accumulation of H3K79me**

204 To determine the global location of H3K79me sites under the influence of KDM2B, we performed  
205 ChIP-seq in KDM2B knockdown stable 293T cells. A comparison of the two ChIP-seq data sets  
206 (control shRNA (shCTL) vs. shKDM2B) using heat maps showed that, at the global human genome  
207 level, H3K79me<sub>3</sub> was enriched under the condition of KDM2B depletion (Figure 5A). The normalized  
208 sequencing depth of ChIP-seq data revealed that, under the KDM2B knockdown condition,  
209 methylation marks were considerably enriched around the centers of H3K79me<sub>3</sub> peaks, suggesting  
210 that KDM2B ablation strongly upregulated H3K79me<sub>3</sub> (Figure 5B). We confirmed that marked  
211 increases in H3K79me<sub>3</sub> occupancy (at the genome-wide level) were correlated with KDM2B  
212 knockdown by analyzing the mean ChIP-seq tag density of shKDM2B compared to that of a shCTL  
213 (Figure 5C). ChIP-seq binding profiles on individual genes such as *GATA4* and *PDE3B* clearly  
214 indicated that H3K79me<sub>3</sub> levels were upregulated in the shKDM2B stable cell line (Figure 5D). To  
215 validate the ChIP-seq experiment, we selected a KDM2B-responsive gene, *PDE3B*, and performed



216 ChIP-qPCR. H3K79me3 accumulated on the *PDE3B* promoter when KDM2B was depleted (Figure  
217 5E). To characterize chromatin profiles near transcription start sites (TSSs) of H3K79me3-occupied  
218 genes, sensitive to KDM2B depletion, we compared H3K79me3 peaks with published ChIP-seq  
219 studies for KDM2B in human acute myeloid leukemia (AML) cells (van den Boom et al., 2016). We  
220 noticed that alterations of H3K79me were correlated with KDM2B binding. KDM2B peaks were  
221 localized at *EGLN1* and *CYFIP1* loci, and H3K79me3 occupancy increased at these two genes after  
222 KDM2B depletion (Figure 5-figure supplement 1A). 61% of genes having more than 2-fold change in  
223 H3K79me3 levels overlapped with KDM2B target genes (Figure 5-figure supplement 1B). The genes  
224 whose H3K79me3 levels increased under the shKDM2B condition were selected and categorized by  
225 gene ontology (GO) term analysis (Figure 5-figure supplement 2). Notably, these genes were related  
226 to well-known functions of H3K79me, including transcriptional regulation and cell cycle control. These  
227 results suggest that KDM2B is responsible for a considerable amount of the H3K79 demethylation  
228 that occurs on its target genes.

229 We next sought to understand the effects of KDM2B recruitment on the levels of H3K79me3 on  
230 target gene promoters. We performed ChIP and quantitative real-time PCR (qRT-PCR) analyses.  
231 Overexpression of wild-type KDM2B considerably decreased H3K79me3 levels on the promoters of  
232 four genes tested and led to transcriptional repression (Figure 5-figure supplement 3A and B). By  
233 contrast, the catalytically deficient KDM2B mutant failed to change H3K79me levels and gene  
234 expression, although it was still recruited to the target promoters (Figure 5-figure supplement 3A and  
235 B). Using two independent KDM2B-knockdown stable cell lines, we observed clear increases in  
236 H3K79me3 deposition on the *HOXA7*, *MEIS1*, *ALX1*, and *GATA4* promoters and concomitant  
237 induction of these target genes expression (Figure 5F and G). We obtained similar results when the  
238 ChIP experiments were normalized to histone H3 occupancy (Figure 5-figure supplement 4A). Also,  
239 the normalized ChIP results for H3K36me2 and H3K4me3 as well as H3K79me3 support the working  
240 model of KDM2B-mediated demethylation in a way of targeting multiple sites (Figure 5-figure  
241 supplement 4B). Collectively, these data show that KDM2B is recruited to specific target gene  
242 promoters and demethylates H3K79me3, resulting in downregulation of transcription.

243

## 244 **Recruitment of SIRT1 protein to target gene promoters by KDM2B**

245 Previous studies showed that H3K79me by Dot1 regulated gene silencing (Ng et al., 2002a; Singer et  
246 al., 1998; van Leeuwen et al., 2002). Silent information regulator (SIR) proteins preferentially bind  
247 chromatin that contains hypomethylated H3K79, and they block H3K79me (Ng et al., 2003). As a  
248 member of the sirtuin family of proteins, SIRT1 is the human homolog of the yeast Sir2 protein, and  
249 mediates deacetylation of histones H3, H4, and H1 (Vaquero et al., 2004). To delineate the  
250 relationship between H3K79 demethylation and SIR protein-mediated transcriptional repression, we  
251 tested whether KDM2B induced the recruitment of SIRT1 to the target gene promoters. We measured  
252 the levels of SIRT1 and H4K16ac on the *HOXA7*, *MEIS1*, *ALX1*, and *GATA4* promoters by ChIP-  
253 qPCR analysis in KDM2B knockdown stable cell lines. We found that depletion of KDM2B increased  
254 H3K79me3 levels (Figure 5G), leading to disruption of chromatin binding of SIRT1 and to increase in  
255 H4K16ac levels (Figure 6A). Enrichment of H4K16ac under KDM2B ablation provides evidence for a  
256 correlation between H3K79me and H4K16ac in transcriptional upregulation. A recent study on the  
257 functional interplay between DOT1L and bromodomain-containing protein 4 (BRD4) reported that  
258 H3K79me, by itself, was not necessary for transcriptional activation, and that H4 acetylation was  
259 required for the actual regulatory effects to occur as downstream events (Gilan et al., 2016). To  
260 evaluate a model of SIRT1 recruitment, we overexpressed KDM2B in the KDM2B knockdown stable  
261 cell line. As expected, H3K79 hypomethylation-facilitated SIRT1 binding was rescued by ectopic  
262 KDM2B (Figure 6-figure supplement 1). We tested whether KDM2B interacted with SIRT1. IP analysis  
263 in 293T cells overexpressing KDM2B and SIRT1 showed that KDM2B bound SIRT1, and the  
264 interaction between endogenous SIRT1 and KDM2B was also detected (Figures 6B and C). SIRT1  
265 has been shown to inhibit chromatin binding of DOT1L by H3K9me2 accumulation and chromatin  
266 compaction via SUV39H1 localization (Chen et al., 2015). To examine whether the decreases in  
267 H3K79me levels mediated by KDM2B were due to its association with SIRT1 and concomitant failure  
268 of DOT1L recruitment, we performed IP assay in wild-type and catalytic mutant of KDM2B  
269 overexpressed cells, and confirmed that KDM2B-H242A also bound SIRT1 (Figure 6-figure  
270 supplement 2). Given that KDM2B-H242A did not alter H3K79me3 levels, as shown in Figure 2A and  
271 Figure 5-figure supplement 3B, we concluded that H3K79me reduction by KDM2B did not originate

272 from DOT1L inaccessibility caused by KDM2B-SIRT1 interaction. This interaction suggests that  
273 KDM2B induces SIRT1 recruitment possibly via H3K79 demethylation and facilitates H4K16  
274 deacetylation. To demonstrate the role of SIRT1 recruitment in transcriptional repression by KDM2B,  
275 we tested whether the SIRT1 inhibitor (sirtinol) abolished KDM2B-mediated repression. Treatment  
276 with sirtinol resulted in a marked recovery of transcription of KDM2B target genes, despite of KDM2B  
277 overexpression (Figure 6D). This is consistent with the results of a previous study that described the  
278 requirement for H4 acetylation in transcriptional activity via alteration of H3K79me levels (Gilan et al.,  
279 2016). Taken together, these results indicate that H3K79 demethylation by KDM2B and subsequent  
280 tethering of SIRT1 are both involved in KDM2B-mediated transcriptional repression.

281

## 282 **Discussion**

283 Although H3K79 is located in the globular domain of histone H3, it is localized on the surface of the  
284 nucleosomal structure, and can be accessed by epigenetic modifiers (van Leeuwen et al., 2002). The  
285 fact that H3K79me is evolutionarily conserved in a wide variety of eukaryotes is a strong indication of  
286 its fundamental role in the regulation of chromatin structure (Mersfelder and Parthun, 2006). Although  
287 extensive studies have been conducted to characterize the role of H3K79me in transcriptional  
288 regulation and its physiological outcome, the identity of the H3K79 demethylase has been uncertain.  
289 In this work, we identified KDM2B as a histone H3K79me<sub>2/3</sub> demethylase. By pull-down assay  
290 followed by mass spectrometry analyses, we identified H3K79me<sub>2</sub>-interacting proteins, including  
291 CBX8. As a component of canonical PRC1 complex, CBX8 recognizes the H3K27me<sub>3</sub> site and  
292 interacts with RING1B to contribute to H2AK119ub and maintenance of transcriptionally repressive  
293 state (Di Croce and Helin, 2013; Gil and O'Loghlen, 2014). The non-canonical PRC1-BCOR-CBX8  
294 complex represses bivalent promoters and contains KDM2B as a component (Beguelin et al., 2016).  
295 In contrast, CBX8 interacts with MLL-AF9 and TIP60, playing a role in transcriptional activation of  
296 MLL-AF9 target genes (Tan et al., 2011). It is possible that CBX8 regulates gene expression in both  
297 positive and negative ways, depending on the enzymatic properties of binding partners, by serving as  
298 a molecular adaptor that localizes catalytic subunits in the complex to target genes. The reason for

299 the interaction between H3K79me2 and CBX8 protein requires further investigation.

300 KDM2B is a member of the F-box protein family that includes KDM2A, which also shows H3K36  
301 demethylase activity. KDM2B and KDM2A share conserved domains, including the JmjC and CXXC  
302 domains, and both proteins bind CpG islands (Blackledge et al., 2010). They both catalyze the  
303 demethylation of H3K36me2, which is a highly abundant modification and is specifically depleted at  
304 CpG islands (Blackledge et al., 2010). According to studies of different H3K27 demethylase activities  
305 of UTX and UTY (Agger et al., 2007; Hong et al., 2007), it remains to be investigated whether KDM2A  
306 also catalyzes H3K79 demethylation. KDM2A does not associate with PcG proteins, and its function  
307 in transcriptional regulation differs subtly from that of KDM2B.

308 H3K79me is found throughout the euchromatic regions of the genomes of yeast and higher  
309 eukaryotes, but it is significantly under-represented in silent chromatin (Ng et al., 2003). Sir2, which is  
310 involved in heterochromatin formation, is not recruited to the region of the chromosome containing  
311 H3K79me in yeast (Ng et al., 2002a). H3K79me2 is excluded from telomeres and from mating-type  
312 loci, to which Sir2 is recruited and mediates heterochromatin formation (Im et al., 2003; van Leeuwen  
313 et al., 2002). H3K79me2/3 are also associated with active gene expression in yeast and mammalian  
314 cells (Im et al., 2003; Pokholok et al., 2005). A recent study suggested that inactivation of DOT1L in  
315 MLL-AF9 leukemia cells enhanced SIRT1 occupancy at most genes marked with H3K79me,  
316 demonstrating an antagonistic relationship between DOT1L and SIRT1 (Chen et al., 2015). In fact, the  
317 heterochromatin proteins Sir3 and Dot1 compete for the basic patch of histone H4 in yeast. H4K16ac  
318 by Sas2 displaces Sir3 and enables Dot1 to bind H3K79, methylating H3K79 (Altaf et al., 2007; Millar  
319 et al., 2004).

320 Our current study reveals that KDM2B is an H3K79me2/3 demethylase and acts as a  
321 transcriptional co-repressor. By CHIP-seq and CHIP-qPCR analyses, we determined that KDM2B led  
322 to loss of H3K79me on target genes. Interestingly, previous study found that knockout of DOT1L  
323 reduced H3K79me2 globally, but it resulted in only a subset of H3K79me2/3 marked loci to be  
324 downregulated (Bernt et al., 2011). In addition, the effects of individual epigenetic modifiers on gene  
325 expression were much more specific and limited than predicted by changes in the status of a single  
326 histone modification (Lenstra et al., 2011). On the basis of these studies, we concluded that even

327 though KDM2B influenced H3K79me at a genome-wide level, additional gene-dependent and context-  
328 dependent mechanisms might be involved in the regulation of gene expression. Recent studies  
329 demonstrated the role of histone H4 acetylation as a link between H3K79me and transcriptional  
330 activation (Gilan et al., 2016). This suggested the importance of a particular chromatin context in the  
331 regulatory processes mediated by changes in H3K79 methylation. We provided evidence that KDM2B  
332 induced the recruitment of SIRT1 to target gene promoters, leading to H4K16 deacetylation and  
333 chromatin silencing. This is consistent with an earlier report that CBX8 is a binding partner of SIRT1,  
334 and that they cooperatively mediate transcriptional repression (Lee et al., 2013).

335 To rule out the hypothesis that KDM2B-mediated repression in our study was derived from  
336 demethylation of two previously known substrates of KDM2B, H3K4 and H3K36, we overexpressed  
337 K4/36R double mutant histone H3 that is not subjected to methylation or demethylation. Transient  
338 overexpression of KDM2B following selection of H3 K4/36R-overexpressing stable cells enabled us to  
339 rule out repressive effects of K4 and K36 demethylations as the explanation and enabled us to  
340 propose an independent mechanism via a new target residue, K79. The wide histone substrate  
341 repertoire for KDM2B demethylase activity, which includes H3K36, H3K4, and H3K79, is interesting  
342 and suggests the possibility that KDM2B may also have non-histone protein substrates. In addition,  
343 considering the identification of new H3K79 HMTases other than DOT1L, it is reasonable to speculate  
344 that there may be other H3K79 demethylases besides KDM2B yet to be identified.

345 Given that the H3K36 demethylase activity of KDM2B was not necessary for its variant PRC1-  
346 mediated H2AK119ub1 and transcriptional repression, we proceeded to determine whether  
347 H2AK119ub1 was required to enable the H3K79 demethylase activity of KDM2B in the variant PRC1  
348 complex. To test this, we used PRT4165, a potent inhibitor of PRC1-mediated histone H2A  
349 ubiquitylation. H2AK119ub levels decreased in the presence of PRT4165, but H3K79me3  
350 demethylation catalyzed by KDM2B was not altered, suggesting that the H3K79 demethylase activity  
351 of KDM2B was independent of PRC1-mediated H2AK119ub1 (data not shown). Via the demethylation  
352 of H3K79, however, KDM2B could possibly play a role in ensuring that genes associated with  
353 H2AK119ub1 by PRC1 are also tri-methylated on H3K27 by PRC2 (Yuan et al., 2011).

354 In summary, we provide *in vitro* and *in vivo* evidence for the possible role of KDM2B as an

355 H3K79me2/3 demethylase and as a co-repressor that regulates gene transcription through SIRT1-  
356 mediated chromatin silencing. Our model suggests that dynamic reversible regulation of histone  
357 methylation is indeed applied to H3K79 methylation. This model supports the existence of H3K79  
358 demethylation by KDM2B and its role in transcriptional regulation (Figure 6E).

359

360

## 361 **Materials and methods**

### 362 **DNA constructs**

363 EFpLink2-FLAG-KDM2B was acquired. The full-length KDM2B coding sequence (CDS) was  
364 transferred into p3XFLAG-CMV<sup>TM</sup>-10, and a catalytic mutant construct was generated by H242A point  
365 mutation. The region (amino acids 1–734) containing the JmjC, CXXC zinc finger, and PHD domains  
366 was cloned into pGEX-4T1 for protein purification. pECE-FLAG-SIRT1 was purchased from Addgene  
367 (#1791). The SIRT1 CDS was subcloned into the modified pcDNA6-HA-MYC-HIS (Invitrogen).

368

### 369 **Cell culture**

370 K562 cells were grown in Roswell Park Memorial Institute (RPMI) 1640 medium. 293T cells were  
371 grown in Dulbecco's modified Eagle's medium (DMEM) containing 10% heat-inactivated fetal bovine  
372 serum and 0.05% penicillin-streptomycin, at 37 °C in a 5% CO<sub>2</sub> atmosphere. 50 μM sirtinol (Sigma-  
373 Aldrich) was treated for 2 h. 100 μM PRT4165 (Tocris Bioscience) was treated for 2 h in serum-free  
374 medium.

375

### 376 **Antibodies**

377 Antibodies used in this study: anti-KDM2B (Millipore), anti-SIRT1 (Millipore), anti-DOT1L (Santa Cruz  
378 Biotechnology), anti-β actin (Santa Cruz Biotechnology), anti-FLAG (Sigma-Aldrich), anti-  
379 hemagglutinin (HA) (Santa Cruz Biotechnology), anti-H3K79me3 (Abcam or Epigentek), anti-  
380 H3K79me2 (Abcam), anti-H3K79me1 (Abcam), anti-H3K36me2 (Abcam), anti-H3K36me3 (Upstate),

381 anti-H3K4me3 (Abcam), anti-H4K16ac (Millipore), and anti-histone H3 (Santa Cruz Biotechnology).

382

### 383 **Peptide pull-down assay**

384 Biotinylated dimethyl H3K79 peptides, H-RLVREIAQDFK[me2]TDLRFQSSAVK[biotin]-OH, and  
385 unmodified H3K79 peptides, H-RLVREIAQDFKTDLRFQSSAVK[biotin]-OH, were purchased from  
386 AnaSpec (California, United States). 5 µg peptides were pre-bound to streptavidin-Sepharose beads  
387 (GE Healthcare) and incubated overnight at 4°C with nuclear extract from K562 cells, dialyzed against  
388 dialysis buffer (20 mM HEPES, pH 7.9, 1.5 mM MgCl<sub>2</sub>, 20% glycerol, 0.2 mM EDTA, 100 mM KCl,  
389 and 0.5 mM DTT), and pre-cleared. The supernatant was stored, and the particles were washed five  
390 times with 1 mL of washing buffer (20 mM HEPES, pH 7.9, 1.5 mM MgCl<sub>2</sub>, 20% glycerol, 0.2 mM  
391 EDTA, 100 mM KCl, 0.5 mM DTT, and 0.1% Triton X-100). Peptide-binding proteins were separated  
392 by SDS-PAGE. A portion of them was stained with silver, while the rest was divided into three parts to  
393 be analyzed by LC-MS/MS.

394

### 395 **In-gel protein digestion and liquid chromatography tandem-mass spectrometry (LC-MS/MS)**

396 Mass spectrometry and proteomic analyses were carried out at the Korea Basic Science Institute.  
397 Separated proteins by two-dimensional gel electrophoreses (2-DE) were visualized using the PlusOne  
398 Silver Staining Kit (Amersham Biosciences), according to the manufacturer's protocol. After electrical  
399 scanning and analysis of silver-stained gels using Phoretix Expression software ver. 2005 (Nonlinear  
400 Dynamics), the protein bands of interest were excised and digested in-gel with sequencing grade  
401 modified trypsin (Promega, Madison, WI, USA). Briefly, excised protein bands were washed with a 1:1  
402 mixture of acetonitrile and 25 mM ammonium bicarbonate (pH 7.8), and subsequently dried using a  
403 SpeedVac concentrator. After drying, rehydration was performed with 25 mM ammonium bicarbonate  
404 (pH 7.8) and trypsin. Tryptic peptides were extracted from supernatants with a 50% aqueous  
405 acetonitrile solution containing 0.1% formic acid. After preparation, tryptic peptides were analyzed  
406 using reversed-phase capillary high-performance liquid chromatography (HPLC) directly coupled to a  
407 Finnigan LCQ ion trap mass spectrometer. Three extractions were performed to recover all tryptic

408 peptides from the gel slices. Recovered peptides were concentrated by drying the combined extracts  
409 in a vacuum centrifuge. Concentrated peptides were mixed with 20  $\mu$ L of 0.1% formic acid in 3%  
410 acetonitrile. Nano LC of the tryptic peptides was performed using the Waters Nano LC system,  
411 equipped with a Waters C18 nano column (75  $\mu$ m  $\times$  15 cm, nanoAcquity UPLC column). Binary  
412 solvent A1 contained 0.1% formic acid in water, and binary solvent B1 contained 0.1% formic acid in  
413 acetonitrile. Samples (5  $\mu$ L) were loaded onto the column, and peptides were subsequently eluted  
414 with a binary solvent B1 gradient (2–40%, 30 min, 0.4  $\mu$ L/min). The lock mass, [Glu1] fibrinopeptide at  
415 400 fmol/ $\mu$ L, was delivered from the auxiliary pump of the Nano LC system at 0.3  $\mu$ L/min to the  
416 reference sprayer of the NanoLockSpray source.

417

#### 418 **Stable knockdown cell lines**

419 DNA oligonucleotides encoding KDM2B short hairpin RNA (shRNA) #1 (5'-  
420 CTGAACCACTGCAAGTCTATC-3') and KDM2B shRNA #2 (5'-CGGCCTTTACAAGAAGACATT-3')  
421 were subcloned into the pLKO.1-puro lentiviral vector (Addgene), according to standard procedures.  
422 To produce virus particles, 293T cells were co-transfected with plasmids encoding vesicular stomatitis  
423 virus glycoprotein (VSV-G), NL-BH, and the shRNAs. Two days after transfection, the supernatants  
424 containing the viruses were collected and used to infect 293T cells in the presence of polybrene (8  
425  $\mu$ g/mL). After lentiviral infection of the 293T cells, the addition of puromycin (1 mg/mL) selected for  
426 cells stably expressing shRNAs of KDM2B.

427

#### 428 **Immunofluorescence analysis**

429 293T cells were transfected with the p3XFLAG-CMV<sup>TM</sup>-KDM2B wild-type or the catalytic mutant, using  
430 Lipofectamine 2000 reagent (Invitrogen). The cells were fixed 48 h after transfection, permeabilized,  
431 and stained with the appropriate antibodies and secondary fluorochrome-labeled antibodies. The  
432 stained cells were analyzed by confocal laser fluorescence microscopy. The following antibodies were  
433 used: anti-FLAG, anti-H3K79me3 (Epigentek), anti-H3K79me1, goat anti-mouse IgG-h+I fluorescein  
434 isothiocyanate (FITC) conjugated (Bethyl Laboratories), Cy<sup>TM</sup>3-conjugated AffiniPure goat anti-rabbit  
435 IgG (H+L) (Jackson Immunoresearch).



436

437 **Histone acid extraction and nucleosome extraction**

438 To extract histones, cell pellets were resuspended in PBS with 0.5% Triton X-100 and protease  
439 inhibitors, and the tubes were subsequently incubated at 4°C for 30 min to lyse the cells. The lysates  
440 were centrifuged at 4°C for 10 min at 10,000 × *g*, and the pellets were resuspended in 0.4 N H<sub>2</sub>SO<sub>4</sub>.  
441 The samples were centrifuged at 4°C for 10 min at 16,000 × *g*. The pellets were again resuspended in  
442 100% trichloroacetic acid (TCA) and centrifuged at 4°C for 10 min at 16,000 × *g*. The histone-  
443 containing pellets were collected and eluted in distilled water. To extract nucleosomes, cell pellets  
444 were resuspended in RSB buffer (10 mM Tris-HCl, pH 7.4, 10 mM NaCl, 3 mM MgCl<sub>2</sub>, 0.5% NP-40, 1  
445 mM DTT, and 1 mM PMSF), and the tubes were subsequently incubated at 4°C for 30 min to lyse the  
446 cells. The lysates were centrifuged at 4°C for 5 min at 4,000 rpm, and the pellets were resuspended in  
447 RSB buffer. The samples were sonicated and centrifuged at 4°C for 5 min at 4,000 rpm. The pellets  
448 were washed four times with RSB buffer and eluted in the same buffer.

449

450 ***In vitro* histone demethylase assay**

451 Bulk histones (Sigma-Aldrich), nucleosomes extracted from 293T cells, and methyl lysine analog  
452 (MLA) containing recombinant H3K79me<sub>3</sub> histones (Active Motif) (Jia et al., 2009; Simon et al., 2007)  
453 were incubated with purified glutathione S-transferase (GST), GST-KDM2B<sub>1-734</sub>, or GST-KDM2A<sub>1-687</sub>,  
454 overnight at 37°C in demethylation assay buffer (20 mM Tris-HCl, pH 7.3, 150 mM NaCl, 1 mM alpha-  
455 ketoglutarate, 50 μM FeSO<sub>4</sub>, and 2 mM ascorbic acid).

456

457 **Formaldehyde dehydrogenase (FDH) assay**

458 Formaldehyde formation was measured by a spectrophotometric assay (Lizcano et al., 2000) using  
459 FDH. GST-KDM2B and MLA histone H3K79me<sub>3</sub> were first incubated for 3 hours at 37°C in  
460 demethylation assay buffer. The reaction solution was immediately mixed in buffer containing 50 mM  
461 potassium phosphate, pH 7.2, 2 mM NAD<sup>+</sup>, and 0.1 U FDH. The FDH reaction was initiated and

462 absorbance at 340 nm was recorded for 5 minutes. The absorbance at 340 nm ( $\epsilon_{340} = 6.22$   
463  $\text{mM}^{-1}\text{cm}^{-1}$  for NADH) was measured at each time point in a 0.5 min interval using WPA Lightwave  
464 S2000 UV/Vis spectrophotometer. The OD 340 nm absorbance at the moment of the FDH addition  
465 was considered as 0 and this was used as the 0 min time point. The data were analyzed using the  
466 Excel program.

467

#### 468 **Nano LC-LTQ-Orbitrap Elite analysis**

469 Digested plasma samples were dissolved in mobile phase A and analyzed using an LC-MS/MS  
470 system consisting of a Nano Acquity UPLC system (Waters, USA) and an LTQ Orbitrap Elite mass  
471 spectrometer (Thermo Scientific, USA) equipped with a Nano-electrospray source. An autosampler  
472 was used to load 5- $\mu\text{L}$  aliquots of the peptide solutions into a C18 trap column of internal diameter (ID)  
473 180  $\mu\text{m}$ , length 20 mm, and particle size 5  $\mu\text{m}$  (Waters, USA). Peptides were desalted and  
474 concentrated on the trap column for 10 min, at a flow rate of 5  $\mu\text{L}/\text{min}$ . The trapped peptides were  
475 then back-flushed and separated on a homemade microcapillary C18 column of ID 100  $\mu\text{m}$  and length  
476 200 mm (Aqua; particle size 3  $\mu\text{m}$ , 125  $\text{\AA}$ ). The mobile phases were composed of 100% water (A) and  
477 100% acetonitrile (ACN) (B), each containing 0.1% formic acid. The LC gradient began with 5%  
478 mobile phase B and was maintained for 15 min. Mobile phase B was linearly ramped to 15% for 5 min,  
479 50% for 75 min, and 95% for 1 min. Then, 95% mobile phase B was maintained for 13 min before  
480 decreasing to 5% for another 1 min. The column was re-equilibrated with 5% mobile phase B for 10  
481 min before the next run. The voltage applied to produce the electrospray was 2.2 kV. During the  
482 chromatographic separation, the LTQ Orbitrap Elite was operated in data-dependent mode. MS data  
483 were acquired using the following parameters: full scans were acquired in the Orbitrap at a resolution  
484 of 120,000 for each sample; six data-dependent collision-induced dissociation (CID) MS/MS scans  
485 were acquired per full scan; CID scans were acquired in a linear trap quadrupole (LTQ) with 10 ms  
486 activation times performed for each sample; 35% normalized collision energy (NCE) was used in CID;  
487 and a 2 Da isolation window for MS/MS fragmentation was applied. Previously fragmented ions were  
488 excluded for 180 s. LC-MS/MS was performed using Nano LC-LTQ-Orbitrap Elite mass spectrometry

489 at the Korea Basic Science Institute (Ochang Headquarters, Division of Bioconvergence Analysis).

490

#### 491 **Isothermal titration calorimetry (ITC)**

492 Isothermal titration calorimetry (ITC) experiments were carried out using an Auto-iTC200  
493 Microcalorimeter at Korea Basic Science Institute. Tri-methyl H3K79 peptides, AQDFK(me3)TDLR,  
494 and unmodified H3K79 peptides, AQDFKTDLR, were purchased from AnyGen. Protein GST-KDM2B  
495 was purified and prepared in the sample cell, and the ligand (H3K79me3 peptide or H3K79me0  
496 peptide) was loaded into the injectable syringe. All samples were prepared in 1X PBS. Titration  
497 measurements that consisted of 19 injections (2  $\mu$ L) with 150 s spacing were performed at 25°C,  
498 while the syringe was stirred at 700 rpm. The data were analyzed using the MicroCal Origin™  
499 software.

500

#### 501 **Radioactive assay**

502 Histone methyltransferase (HMTase) assays were carried out at 30°C overnight, in 30- $\mu$ L volume  
503 containing 20 mM Tris-HCl [pH 8.0], 4 mM EDTA, 1 mM phenylmethylsulfonyl fluoride (PMSF), 0.5  
504 mM dithiothreitol (DTT), 100 nCi of S-Adenosyl-L-methionine [methyl-<sup>14</sup>C] (<sup>14</sup>C-SAM) (Perkin Elmer),  
505 15  $\mu$ g core histones from calf thymus (Sigma-Aldrich), and GST-DOT1L, GST-MMSET, or GST-  
506 SMYD3, respectively. <sup>14</sup>C-labeled histones were subjected to histone demethylase assay using either  
507 purified GST or GST-KDM2B<sub>1-734</sub>. The histones were transferred onto p81 filter paper (Upstate) and  
508 washed three times with 95% ethanol for 5 min at room temperature. The filters were allowed to air  
509 dry, and 2 mL of Ultima Gold (Perkin Elmer) was added afterwards. <sup>14</sup>C-SAM was then quantified  
510 using a scintillation counter.

511

#### 512 **Luciferase assay**

513 Luciferase assays were conducted using the *HOXA7*, *MEIS1*, simian virus 40 (SV40), and thymidine  
514 kinase (TK) promoter reporter systems. 293T cells were co-transfected with the corresponding  
515 promoter reporter constructs and the indicated DNA constructs, using polyethylenimine (PEI). Cells

516 were harvested after 48 h and assayed for luciferase activity using a luciferase assay system  
517 (Promega). Each value is expressed as the mean of five replicates of a single assay. All experiments  
518 were performed at least three times.

519

## 520 **Chromatin immunoprecipitation (ChIP)-quantitative polymerase chain reaction (qPCR) and** 521 **ChIP sequencing (ChIP-Seq) Analyses**

522 Formaldehyde (1%) was added to the medium for 10 min at room temperature, followed by the  
523 addition of 125 mM glycine for 5 min at room temperature. Adherent cells were scraped from dishes  
524 into 1 mL PBS. The scraped cells were centrifuged, and the resulting pellets were washed once with  
525 PBS. The pellets were resuspended in sodium dodecyl sulfate (SDS) lysis buffer (1% SDS, 10 mM  
526 EDTA, and 50 mM Tris-HCl, pH 8.1). The cell lysates were sonicated, diluted with five volumes of  
527 dilution buffer (0.01% SDS, 1.2 mM EDTA, 1.1% Triton X-100, 167 mM NaCl, and 16.7 mM Tris-HCl,  
528 pH 8.1), and incubated overnight with indicated antibodies (1  $\mu$ g antibody for each IP reaction). The  
529 next day, protein A/G-Agarose beads (GenDEPOT) were added to the reaction, incubated for 2 h, and  
530 washed with low salt wash buffer, high salt wash buffer, LiCl immune wash buffer, and Tris-EDTA (TE)  
531 buffer. The immunoprecipitates were eluted and reverse cross-linked at 65°C. Afterwards, the DNA  
532 fragments were purified either for polymerase chain reaction (PCR) amplification or for sequencing  
533 using Illumina HiSeq 2000.

534 Values represent mean  $\pm$ SD of technical duplicates from a representative experiment. All experiments  
535 were performed three times with similar results.

536

## 537 **qPCR Analyses**

538 The immunoprecipitated DNA fragments were purified and PCR-amplified for quantification, using  
539 each PCR primer pair. Disassociation curves were generated after each PCR run to ensure  
540 amplification of a single product of the appropriate length. The mean threshold cycle ( $C_T$ ) and  
541 standard error values were calculated from individual  $C_T$  values, obtained from duplicate reactions per  
542 stage. The normalized mean  $C_T$  value was estimated as  $\Delta C_T$  by subtracting the mean  $C_T$  of the input.

543 To analyze promoter regions of *HOXA7*, *MEIS1*, *ALX1*, and *GATA4*, and 5' ends of *PDE3B*, primer  
544 sets indicated in Table S1 were used. The primer concentration used for qPCR (Bio-Rad) was 0.2  
545  $\mu\text{M}/10 \mu\text{L}$ . The thermal cycler conditions were as follows: 15 min of holding at 95°C, followed by 39  
546 cycles at 94°C for 15 s, 56°C for 30 s, and 72°C for 30 s.

547

#### 548 **Statistics**

549 Data were analyzed by Student t-test as indicated.

550

#### 551 **Acknowledgements**

552 We are grateful to Dr. Vivian Bardwell (University of Minnesota) for providing EFplink2-FLAG-KDM2B.  
553 We would like to thank Dr. Jin Young Kim and Dr. Ju Yeon Lee (Korea Basic Science Institute,  
554 Ochang Headquarter, Division of Bioconvergence Analysis) for the nano LC-LTQ-Orbitrap analysis.  
555 The ChIP-seq data are available from GEO (Gene Expression Omnibus) under accession number  
556 GSE89052.

557

#### 558 **Competing interests**

559 The authors declare that no competing interests exist.

560

#### 561 **Additional information**

562 National Research Foundation of Korea (NRF) grant funded by the Ministry of Science and  
563 Technology, Basic Science Research program [NRF-2017R1A2B4004407 to J.Y.K. and J.Y.H.];  
564 National Research Foundation of Korea (NRF) grant funded by the Ministry of Science, ICT & Future  
565 Planning [NRF-2016R1A4A1008035 to J.Y.K., J.W.P., H.C., J.Y.H., and Y.C.C.]; This research was  
566 supported by the Chung-Ang University *Excellent Student Scholarship* in 2013.

567 **References**

- 568 Agger, K., Cloos, P.A., Christensen, J., Pasini, D., Rose, S., Rappsilber, J., Issaeva, I., Canaani, E., Salcini,  
569 A.E., and Helin, K. (2007). UTX and JMJD3 are histone H3K27 demethylases involved in HOX gene  
570 regulation and development. *Nature* *449*, 731-734.
- 571 Altaf, M., Utley, R.T., Lacoste, N., Tan, S., Briggs, S.D., and Cote, J. (2007). Interplay of chromatin  
572 modifiers on a short basic patch of histone H4 tail defines the boundary of telomeric  
573 heterochromatin. *Molecular cell* *28*, 1002-1014.
- 574 Beguelin, W., Teater, M., Gearhart, M.D., Calvo Fernandez, M.T., Goldstein, R.L., Cardenas, M.G.,  
575 Hatzi, K., Rosen, M., Shen, H., Corcoran, C.M., *et al.* (2016). EZH2 and BCL6 Cooperate to Assemble  
576 CBX8-BCOR Complex to Repress Bivalent Promoters, Mediate Germinal Center Formation and  
577 Lymphomagenesis. *Cancer cell* *30*, 197-213.
- 578 Berger, S.L. (2007). The complex language of chromatin regulation during transcription. *Nature* *447*,  
579 407-412.
- 580 Bernt, K.M., Zhu, N., Sinha, A.U., Vempati, S., Faber, J., Krivtsov, A.V., Feng, Z., Punt, N., Daigle, A.,  
581 Bullinger, L., *et al.* (2011). MLL-rearranged leukemia is dependent on aberrant H3K79 methylation  
582 by DOT1L. *Cancer cell* *20*, 66-78.
- 583 Bitoun, E., Oliver, P.L., and Davies, K.E. (2007). The mixed-lineage leukemia fusion partner AF4  
584 stimulates RNA polymerase II transcriptional elongation and mediates coordinated chromatin  
585 remodeling. *Human molecular genetics* *16*, 92-106.

586 Blackledge, N.P., Farcas, A.M., Kondo, T., King, H.W., McGouran, J.F., Hanssen, L.L., Ito, S., Cooper, S.,  
587 Kondo, K., Koseki, Y., *et al.* (2014). Variant PRC1 complex-dependent H2A ubiquitylation drives  
588 PRC2 recruitment and polycomb domain formation. *Cell* *157*, 1445-1459.

589 Blackledge, N.P., Zhou, J.C., Tolstorukov, M.Y., Farcas, A.M., Park, P.J., and Klose, R.J. (2010). CpG  
590 islands recruit a histone H3 lysine 36 demethylase. *Molecular cell* *38*, 179-190.

591 Bracken, A.P., Dietrich, N., Pasini, D., Hansen, K.H., and Helin, K. (2006). Genome-wide mapping of  
592 Polycomb target genes unravels their roles in cell fate transitions. *Genes & development* *20*, 1123-  
593 1136.

594 Briggs, S.D., Xiao, T., Sun, Z.W., Caldwell, J.A., Shabanowitz, J., Hunt, D.F., Allis, C.D., and Strahl, B.D.  
595 (2002). Gene silencing: trans-histone regulatory pathway in chromatin. *Nature* *418*, 498.

596 Chen, C.W., Koche, R.P., Sinha, A.U., Deshpande, A.J., Zhu, N., Eng, R., Doench, J.G., Xu, H., Chu, S.H.,  
597 Qi, J., *et al.* (2015). DOT1L inhibits SIRT1-mediated epigenetic silencing to maintain leukemic gene  
598 expression in MLL-rearranged leukemia. *Nature medicine* *21*, 335-343.

599 Cheng, Z., Cheung, P., Kuo, A.J., Yukl, E.T., Wilmot, C.M., Gozani, O., and Patel, D.J. (2014). A  
600 molecular threading mechanism underlies Jumonji lysine demethylase KDM2A regulation of  
601 methylated H3K36. *Genes & development* *28*, 1758-1771.

602 Cheung, P., Allis, C.D., and Sassone-Corsi, P. (2000). Signaling to chromatin through histone  
603 modifications. *Cell* *103*, 263-271.

604 Di Croce, L., and Helin, K. (2013). Transcriptional regulation by Polycomb group proteins. *Nature*

605 structural & molecular biology *20*, 1147-1155.

606 Farcas, A.M., Blackledge, N.P., Sudbery, I., Long, H.K., McGouran, J.F., Rose, N.R., Lee, S., Sims, D.,  
607 Cerase, A., Sheahan, T.W., *et al.* (2012). KDM2B links the Polycomb Repressive Complex 1 (PRC1) to  
608 recognition of CpG islands. *eLife* *7*, e00205.

609 Feng, Q., Wang, H., Ng, H.H., Erdjument-Bromage, H., Tempst, P., Struhl, K., and Zhang, Y. (2002).  
610 Methylation of H3-lysine 79 is mediated by a new family of HMTases without a SET domain.  
611 *Current biology : CB* *12*, 1052-1058.

612 Frescas, D., Guardavaccaro, D., Bassermann, F., Koyama-Nasu, R., and Pagano, M. (2007).  
613 JHDM1B/FBXL10 is a nucleolar protein that represses transcription of ribosomal RNA genes.  
614 *Nature* *450*, 309-313.

615 Gil, J., and O'Loghlen, A. (2014). PRC1 complex diversity: where is it taking us? *Trends in cell*  
616 *biology* *24*, 632-641.

617 Gilan, O., Lam, E.Y., Becher, I., Lugo, D., Cannizzaro, E., Joberty, G., Ward, A., Wiese, M., Fong, C.Y.,  
618 Ftouni, S., *et al.* (2016). Functional interdependence of BRD4 and DOT1L in MLL leukemia. *Nature*  
619 *structural & molecular biology* *23*, 673-681.

620 He, J., Nguyen, A.T., and Zhang, Y. (2011). KDM2b/JHDM1b, an H3K36me2-specific demethylase, is  
621 required for initiation and maintenance of acute myeloid leukemia. *Blood* *117*, 3869-3880.

622 He, J., Shen, L., Wan, M., Taranova, O., Wu, H., and Zhang, Y. (2013). Kdm2b maintains murine  
623 embryonic stem cell status by recruiting PRC1 complex to CpG islands of developmental genes.



- 624 Nature cell biology *15*, 373-384.
- 625 Hong, S., Cho, Y.W., Yu, L.R., Yu, H., Veenstra, T.D., and Ge, K. (2007). Identification of JmjC domain-  
626 containing UTX and JMJD3 as histone H3 lysine 27 demethylases. Proceedings of the National  
627 Academy of Sciences of the United States of America *104*, 18439-18444.
- 628 Huyen, Y., Zgheib, O., Ditullio, R.A., Jr., Gorgoulis, V.G., Zacharatos, P., Petty, T.J., Sheston, E.A.,  
629 Mellert, H.S., Stavridi, E.S., and Halazonetis, T.D. (2004). Methylated lysine 79 of histone H3 targets  
630 53BP1 to DNA double-strand breaks. Nature *432*, 406-411.
- 631 Im, H., Park, C., Feng, Q., Johnson, K.D., Kiekhäfer, C.M., Choi, K., Zhang, Y., and Bresnick, E.H.  
632 (2003). Dynamic regulation of histone H3 methylated at lysine 79 within a tissue-specific  
633 chromatin domain. The Journal of biological chemistry *278*, 18346-18352.
- 634 Jia, G., Wang, W., Li, H., Mao, Z., Cai, G., Sun, J., Wu, H., Xu, M., Yang, P., Yuan, W., *et al.* (2009). A  
635 systematic evaluation of the compatibility of histones containing methyl-lysine analogues with  
636 biochemical reactions. Cell Res *19*, 1217-1220.
- 637 Lacoste, N., Utley, R.T., Hunter, J.M., Poirier, G.G., and Cote, J. (2002). Disruptor of telomeric  
638 silencing-1 is a chromatin-specific histone H3 methyltransferase. The Journal of biological  
639 chemistry *277*, 30421-30424.
- 640 Lee, J.S., Smith, E., and Shilatifard, A. (2010). The language of histone crosstalk. Cell *142*, 682-685.
- 641 Lee, S.H., Um, S.J., and Kim, E.J. (2013). CBX8 suppresses Sirtinol-induced premature senescence in  
642 human breast cancer cells via cooperation with SIRT1. Cancer letters *335*, 397-403.

643 Lenstra, T.L., Benschop, J.J., Kim, T., Schulze, J.M., Brabers, N.A., Margaritis, T., van de Pasch, L.A., van  
644 Heesch, S.A., Brok, M.O., Groot Koerkamp, M.J., *et al.* (2011). The specificity and topology of  
645 chromatin interaction pathways in yeast. *Molecular cell* *42*, 536-549.

646 Liang, G., He, J., and Zhang, Y. (2012). Kdm2b promotes induced pluripotent stem cell generation  
647 by facilitating gene activation early in reprogramming. *Nature cell biology* *14*, 457-466.

648 Lizcano, J.M., Unzeta, M., and Tipton, K.F. (2000). A spectrophotometric method for determining  
649 the oxidative deamination of methylamine by the amine oxidases. *Anal Biochem* *286*, 75-79.

650 Luger, K., Mader, A.W., Richmond, R.K., Sargent, D.F., and Richmond, T.J. (1997). Crystal structure of  
651 the nucleosome core particle at 2.8 Å resolution. *Nature* *389*, 251-260.

652 Martin, C., and Zhang, Y. (2005). The diverse functions of histone lysine methylation. *Nature*  
653 reviews *Molecular cell biology* *6*, 838-849.

654 Mersfelder, E.L., and Parthun, M.R. (2006). The tale beyond the tail: histone core domain  
655 modifications and the regulation of chromatin structure. *Nucleic acids research* *34*, 2653-2662.

656 Millar, C.B., Kurdistani, S.K., and Grunstein, M. (2004). Acetylation of yeast histone H4 lysine 16: a  
657 switch for protein interactions in heterochromatin and euchromatin. *Cold Spring Harbor symposia*  
658 on quantitative biology *69*, 193-200.

659 Morishita, M., Mevius, D., and di Luccio, E. (2014). In vitro histone lysine methylation by NSD1,  
660 NSD2/MMSET/WHSC1 and NSD3/WHSC1L. *BMC structural biology* *14*, 25.

661 Mosammamarast, N., and Shi, Y. (2010). Reversal of histone methylation: biochemical and

662 molecular mechanisms of histone demethylases. *Annual review of biochemistry* *79*, 155-179.

663 Mueller, D., Bach, C., Zeisig, D., Garcia-Cuellar, M.P., Monroe, S., Sreekumar, A., Zhou, R., Nesvizhskii,  
664 A., Chinnaiyan, A., Hess, J.L., *et al.* (2007). A role for the MLL fusion partner ENL in transcriptional  
665 elongation and chromatin modification. *Blood* *110*, 4445-4454.

666 Ng, H.H., Ciccone, D.N., Morshead, K.B., Oettinger, M.A., and Struhl, K. (2003). Lysine-79 of histone  
667 H3 is hypomethylated at silenced loci in yeast and mammalian cells: a potential mechanism for  
668 position-effect variegation. *Proceedings of the National Academy of Sciences of the United States*  
669 *of America* *100*, 1820-1825.

670 Ng, H.H., Feng, Q., Wang, H., Erdjument-Bromage, H., Tempst, P., Zhang, Y., and Struhl, K. (2002a).  
671 Lysine methylation within the globular domain of histone H3 by Dot1 is important for telomeric  
672 silencing and Sir protein association. *Genes & development* *16*, 1518-1527.

673 Ng, H.H., Xu, R.M., Zhang, Y., and Struhl, K. (2002b). Ubiquitination of histone H2B by Rad6 is  
674 required for efficient Dot1-mediated methylation of histone H3 lysine 79. *The Journal of biological*  
675 *chemistry* *277*, 34655-34657.

676 Nguyen, A.T., and Zhang, Y. (2011). The diverse functions of Dot1 and H3K79 methylation. *Genes*  
677 *& development* *25*, 1345-1358.

678 Okada, Y., Feng, Q., Lin, Y., Jiang, Q., Li, Y., Coffield, V.M., Su, L., Xu, G., and Zhang, Y. (2005).  
679 hDOT1L links histone methylation to leukemogenesis. *Cell* *121*, 167-178.

680 Okada, Y., Jiang, Q., Lemieux, M., Jeannotte, L., Su, L., and Zhang, Y. (2006). Leukaemic

681 transformation by CALM-AF10 involves upregulation of Hoxa5 by hDOT1L. *Nature cell biology* *8*,  
682 1017-1024.

683 Ooga, M., Inoue, A., Kageyama, S., Akiyama, T., Nagata, M., and Aoki, F. (2008). Changes in H3K79  
684 methylation during preimplantation development in mice. *Biology of reproduction* *78*, 413-424.

685 Pfau, R., Tzatsos, A., Kampranis, S.C., Serebrennikova, O.B., Bear, S.E., and Tschlis, P.N. (2008).  
686 Members of a family of JmjC domain-containing oncoproteins immortalize embryonic fibroblasts  
687 via a JmjC domain-dependent process. *Proceedings of the National Academy of Sciences of the*  
688 *United States of America* *105*, 1907-1912.

689 Pokholok, D.K., Harbison, C.T., Levine, S., Cole, M., Hannett, N.M., Lee, T.I., Bell, G.W., Walker, K.,  
690 Rolfe, P.A., Herbolsheimer, E., *et al.* (2005). Genome-wide map of nucleosome acetylation and  
691 methylation in yeast. *Cell* *122*, 517-527.

692 Sanchez, C., Sanchez, I., Demmers, J.A., Rodriguez, P., Strouboulis, J., and Vidal, M. (2007).  
693 Proteomics analysis of Ring1B/Rnf2 interactors identifies a novel complex with the Fbxl10/Jhdm1B  
694 histone demethylase and the Bcl6 interacting corepressor. *Molecular & cellular proteomics : MCP*  
695 *6*, 820-834.

696 Schubeler, D., MacAlpine, D.M., Scalzo, D., Wirbelauer, C., Kooperberg, C., van Leeuwen, F.,  
697 Gottschling, D.E., O'Neill, L.P., Turner, B.M., Delrow, J., *et al.* (2004). The histone modification pattern  
698 of active genes revealed through genome-wide chromatin analysis of a higher eukaryote. *Genes &*  
699 *development* *18*, 1263-1271.

700 Schulze, J.M., Jackson, J., Nakanishi, S., Gardner, J.M., Hentrich, T., Haug, J., Johnston, M., Jaspersen,  
701 S.L., Kobor, M.S., and Shilatifard, A. (2009). Linking cell cycle to histone modifications: SBF and H2B  
702 monoubiquitination machinery and cell-cycle regulation of H3K79 dimethylation. *Molecular cell* *35*,  
703 626-641.

704 Shanower, G.A., Muller, M., Blanton, J.L., Honti, V., Gyurkovics, H., and Schedl, P. (2005).  
705 Characterization of the grappa gene, the *Drosophila* histone H3 lysine 79 methyltransferase.  
706 *Genetics* *169*, 173-184.

707 Shi, Y., Lan, F., Matson, C., Mulligan, P., Whetstine, J.R., Cole, P.A., Casero, R.A., and Shi, Y. (2004).  
708 Histone demethylation mediated by the nuclear amine oxidase homolog LSD1. *Cell* *119*, 941-953.

709 Simon, M.D., Chu, F., Racki, L.R., de la Cruz, C.C., Burlingame, A.L., Panning, B., Narlikar, G.J., and  
710 Shokat, K.M. (2007). The site-specific installation of methyl-lysine analogs into recombinant  
711 histones. *Cell* *128*, 1003-1012.

712 Singer, M.S., Kahana, A., Wolf, A.J., Meisinger, L.L., Peterson, S.E., Goggin, C., Mahowald, M., and  
713 Gottschling, D.E. (1998). Identification of high-copy disruptors of telomeric silencing in  
714 *Saccharomyces cerevisiae*. *Genetics* *150*, 613-632.

715 Strahl, B.D., and Allis, C.D. (2000). The language of covalent histone modifications. *Nature* *403*, 41-  
716 45.

717 Tan, J., Jones, M., Koseki, H., Nakayama, M., Muntean, A.G., Maillard, I., and Hess, J.L. (2011). CBX8,  
718 a polycomb group protein, is essential for MLL-AF9-induced leukemogenesis. *Cancer cell* *20*, 563-

719 575.

720 Tsukada, Y., Fang, J., Erdjument-Bromage, H., Warren, M.E., Borchers, C.H., Tempst, P., and Zhang, Y.  
721 (2006). Histone demethylation by a family of JmjC domain-containing proteins. *Nature* *439*, 811-  
722 816.

723 Tzatsos, A., Paskaleva, P., Ferrari, F., Deshpande, V., Stoykova, S., Contino, G., Wong, K.K., Lan, F.,  
724 Trojer, P., Park, P.J., *et al.* (2013). KDM2B promotes pancreatic cancer via Polycomb-dependent and  
725 -independent transcriptional programs. *The Journal of clinical investigation* *123*, 727-739.

726 Tzatsos, A., Pfau, R., Kampranis, S.C., and Tschlis, P.N. (2009). Ndy1/KDM2B immortalizes mouse  
727 embryonic fibroblasts by repressing the Ink4a/Arf locus. *Proceedings of the National Academy of*  
728 *Sciences of the United States of America* *106*, 2641-2646.

729 Vakoc, C.R., Sachdeva, M.M., Wang, H., and Blobel, G.A. (2006). Profile of histone lysine methylation  
730 across transcribed mammalian chromatin. *Molecular and cellular biology* *26*, 9185-9195.

731 van den Boom, V., Maat, H., Geugien, M., Rodriguez Lopez, A., Sotoca, A.M., Jaques, J., Brouwers-  
732 Vos, A.Z., Fusetti, F., Groen, R.W., Yuan, H., *et al.* (2016). Non-canonical PRC1.1 Targets Active Genes  
733 Independent of H3K27me3 and Is Essential for Leukemogenesis. *Cell reports* *14*, 332-346.

734 van Leeuwen, F., Gafken, P.R., and Gottschling, D.E. (2002). Dot1p modulates silencing in yeast by  
735 methylation of the nucleosome core. *Cell* *109*, 745-756.

736 Vaquero, A., Scher, M., Lee, D., Erdjument-Bromage, H., Tempst, P., and Reinberg, D. (2004). Human  
737 SirT1 interacts with histone H1 and promotes formation of facultative heterochromatin. *Molecular*

738 cell *16*, 93-105.

739 Wang, T., Chen, K., Zeng, X., Yang, J., Wu, Y., Shi, X., Qin, B., Zeng, L., Esteban, M.A., Pan, G., *et al.*

740 (2011). The histone demethylases Jhdm1a/1b enhance somatic cell reprogramming in a vitamin-C-

741 dependent manner. *Cell stem cell* *9*, 575-587.

742 Woo Park, J., Kim, K.B., Kim, J.Y., Chae, Y.C., Jeong, O.S., and Seo, S.B. (2015). RE-IIBP Methylates

743 H3K79 and Induces MEIS1-mediated Apoptosis via H2BK120 Ubiquitination by RNF20. *Scientific*

744 *reports* *5*, 12485.

745 Wu, X., Johansen, J.V., and Helin, K. (2013). Fbxl10/Kdm2b recruits polycomb repressive complex 1

746 to CpG islands and regulates H2A ubiquitylation. *Molecular cell* *49*, 1134-1146.

747 Wysocka, J., Milne, T.A., and Allis, C.D. (2005). Taking LSD 1 to a new high. *Cell* *122*, 654-658.

748 Wysocki, R., Javaheri, A., Allard, S., Sha, F., Cote, J., and Kron, S.J. (2005). Role of Dot1-dependent

749 histone H3 methylation in G1 and S phase DNA damage checkpoint functions of Rad9. *Molecular*

750 *and cellular biology* *25*, 8430-8443.

751 Yuan, W., Xu, M., Huang, C., Liu, N., Chen, S., and Zhu, B. (2011). H3K36 methylation antagonizes

752 PRC2-mediated H3K27 methylation. *The Journal of biological chemistry* *286*, 7983-7989.

753

754

755

756

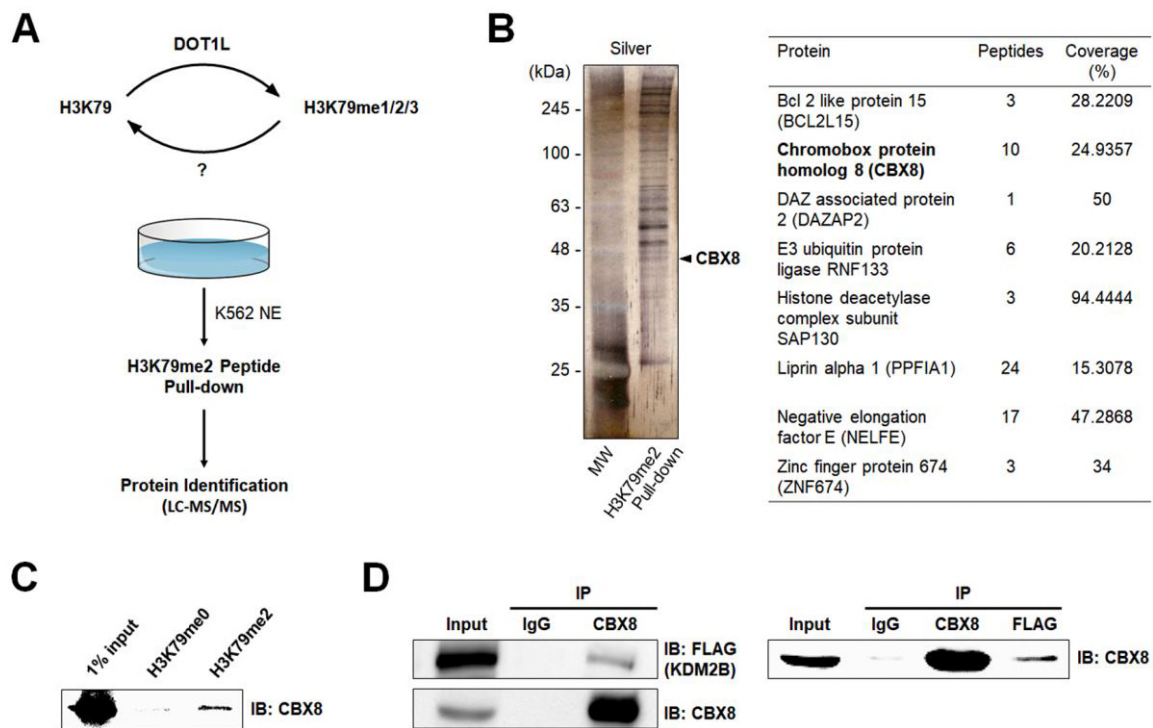

757

758

759 **Figure 1.** Identification of H3K79me2-associated proteins. **(A)** Schematic representation of pull-down  
 760 assay using H3K79me2 peptides in K562 nuclear extract. **(B)** The pulldown complex was separated  
 761 using 12% SDS-PAGE and visualized by silver staining. The gel was sliced into three sections and  
 762 subjected to LC-MS/MS analysis. Several peptide sequences containing CBX8 fragments were  
 763 detected. **(C)** Pull-down of H3K79me2 and H3K79me0 (as a negative control) in K562 whole cell  
 764 lysate. **(D)** Immunoprecipitation of endogenous CBX8 and ectopically overexpressed FLAG-KDM2B in  
 765 293T cells.

766

767

768

769

770

771



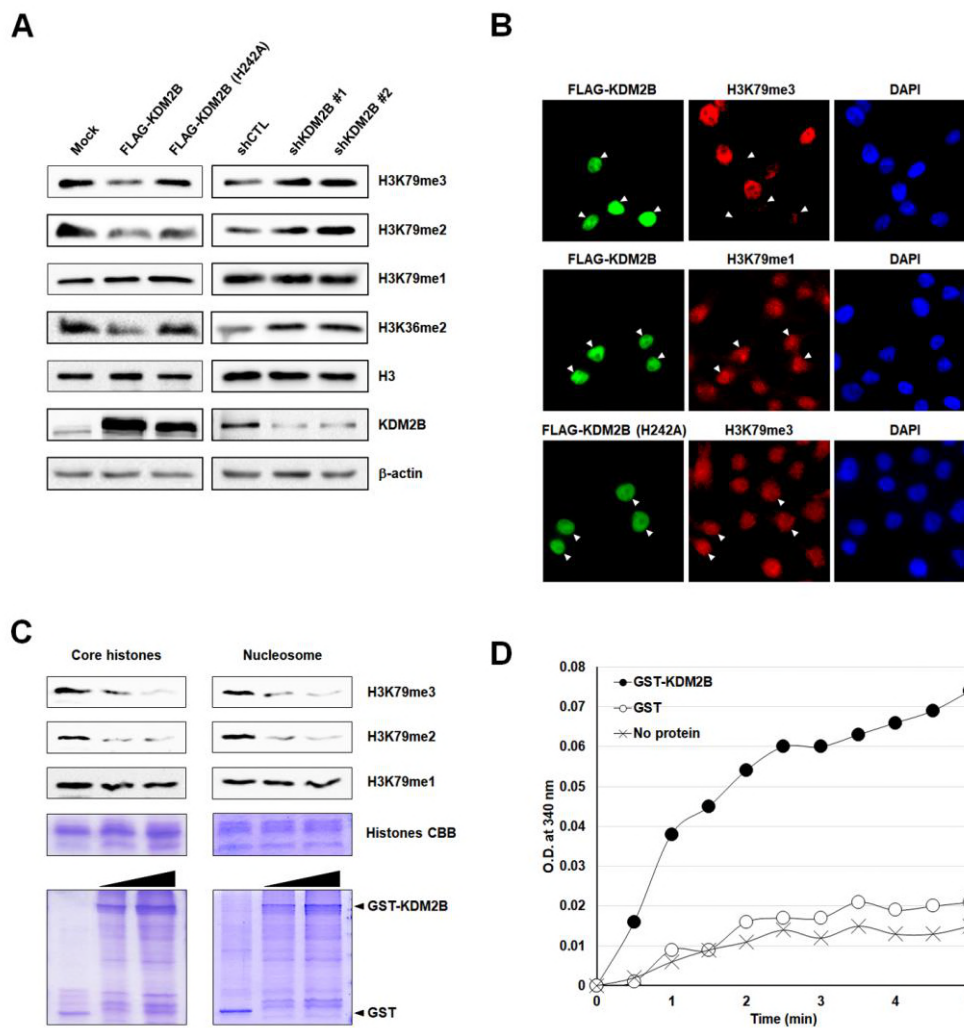

772

773

774 **Figure 2.** KDM2B demethylates histone H3K79me2/3. **(A)** Effects of overexpression and knockdown  
775 of KDM2B on H3K79 demethylation. FLAG-tagged KDM2B wild-type and catalytically deficient H242A  
776 mutant were transfected into 293T cells. H3K79me1/2/3 levels were detected by western blotting.  
777 KDM2B knockdown stable 293T cells were analyzed in the same way. **(B)** Immunocytochemistry of  
778 293T cells expressing FLAG-KDM2B wild-type and KDM2B-H242A. Changes in signal intensity were  
779 detected after double immunostaining with anti-FLAG and anti-H3K79me1/3 antibodies. Arrows  
780 indicate transfected cells. **(C)** KDM2B *in vitro* demethylase assay. Upper: Core histones and  
781 nucleosomes were used as substrates. Demethylation activity of KDM2B against di- and tri-methyl  
782 H3K79 is shown. Lower: Purified GST and GST-KDM2B<sub>1-734</sub> recombinant proteins used were  
783 visualized by Coomassie staining. **(D)** Formaldehyde production was detected by FDH assay. NADH  
784 production was measured at OD 340 nm after 3-hour reaction using GST-KDM2B together with  
785 recombinant MLA histone H3K79me3 as substrates. Absence of demethylase and GST were used as  
786 negative controls.

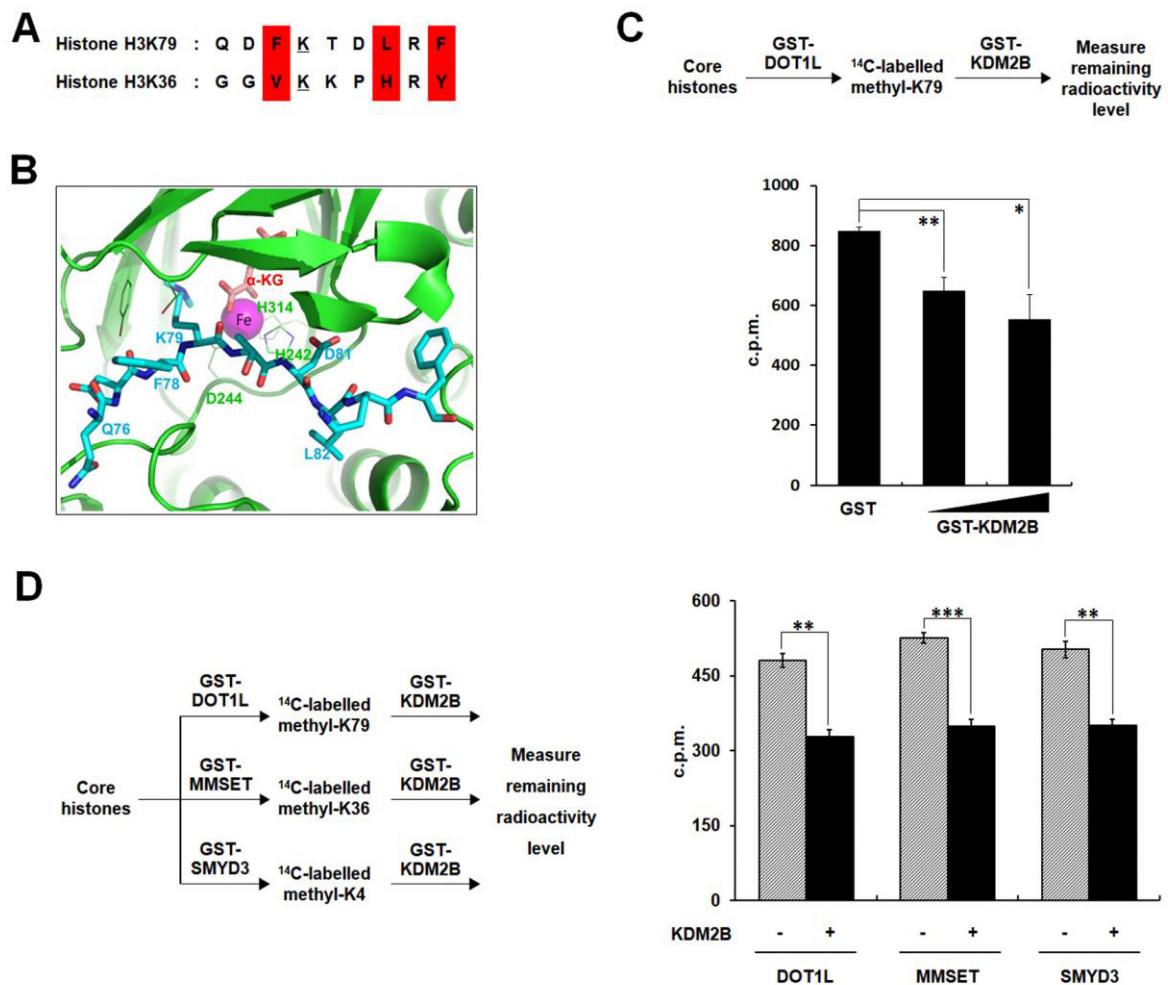

787

788

789 **Figure 3.** Structural modeling of KDM2B demethylase activity. **(A)** Comparative sequence analysis of  
 790 nine amino acids around K36 and K79 of histone H3. **(B)** Crystal structure of KDM2B with enlarged  
 791 residues critical for binding to H3K79. Iron co-factor and H3K79 residues in the catalytic pocket are  
 792 shown. **(C)** Radioactive assay using core histones. H3K79 residues were  $^{14}\text{C}$ -labeled by GST-DOT1L  
 793 through histone methyltransferase assay and the histones were used in histone demethylase assays  
 794 with GST-KDM2B. Remaining radioactivity levels from histones were measured by scintillation  
 795 counting to assess demethylase activity. All error bars indicate standard error of mean (SEM) for at  
 796 least triplicated experiments. **(D)** Radioactive assays using core histones. H3K79, H3K36, and H3K4  
 797 residues were  $^{14}\text{C}$ -labeled by DOT1L, MMSET, and SMYD3, respectively.  $^{14}\text{C}$ -labeled histones were  
 798 used in histone demethylase assays with KDM2B. Remaining radioactivity levels from histones were  
 799 measured by scintillation counting to assess demethylase activity. All error bars indicate SEM for at  
 800 least triplicated experiments.

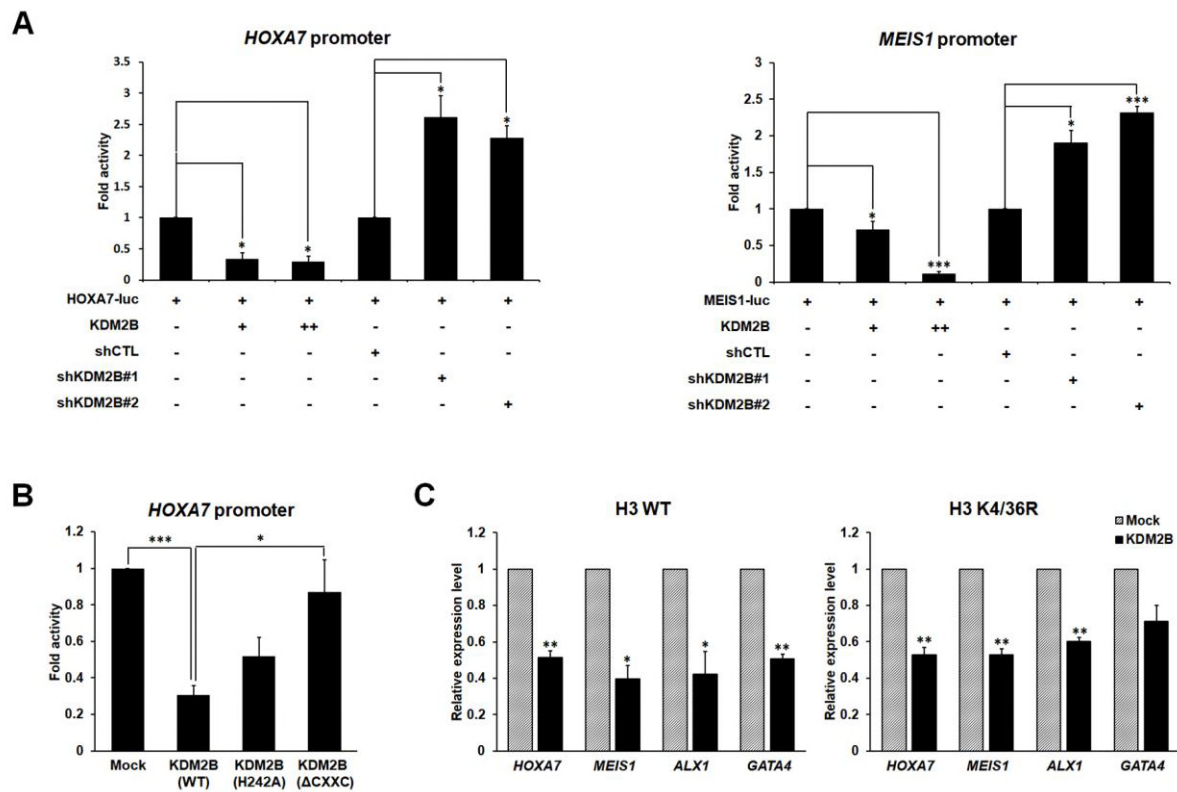

801

802

803 **Figure 4.** KDM2B-mediated transcriptional repression via H3K79 demethylation. **(A)** Luciferase assay

804 using KDM2B target gene promoters. Promoter activities were analyzed with overexpression or

805 depletion of KDM2B. All values are shown as standard error of mean (SEM),  $n = 3$ ;  $*p < 0.05$ ,  $**p <$

806  $0.01$ ,  $***p < 0.001$ . **(B)** Luciferase assays using catalytically inactive mutants and deletion mutants of

807 KDM2B. All values are shown as SEM. **(C)** qRT-PCR analysis of target gene expression in cells stably

808 overexpressing histone H3 wild-type or K4/36R mutant. All error bars indicate SEM for at least

809 triplicated experiments.

810

811

812

813

814

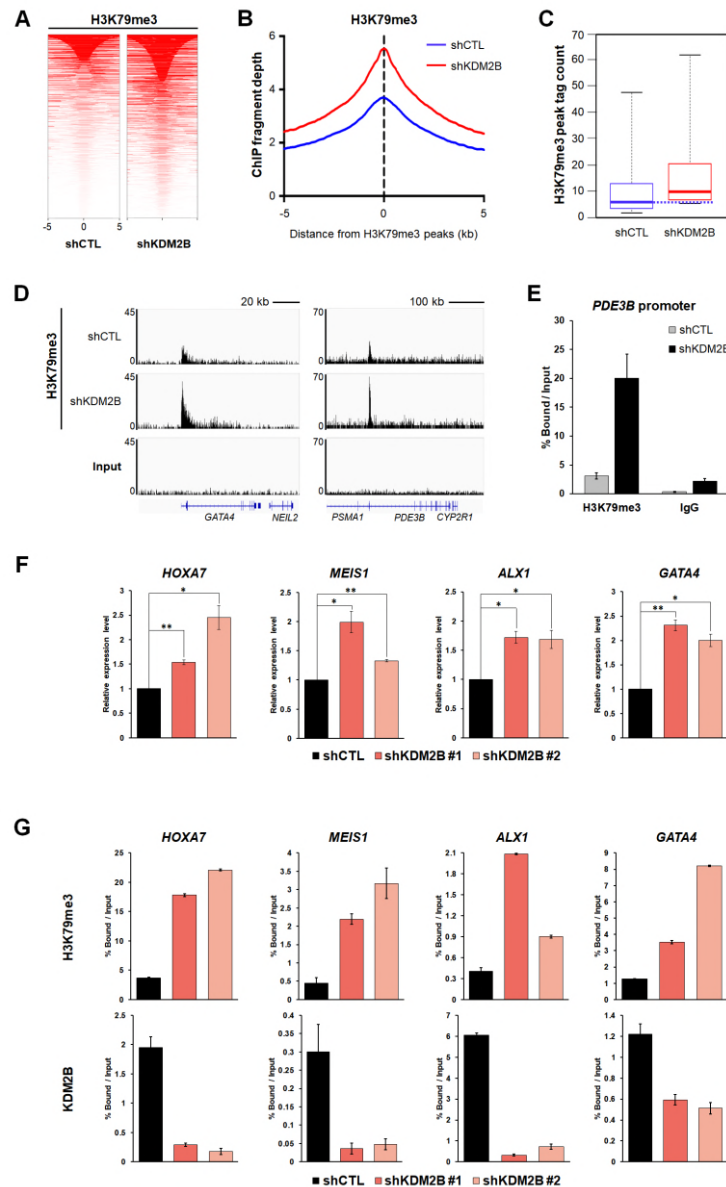

815

816

817 **Figure 5.** KDM2B lowers H3K79me3 occupancy at target gene promoters. **(A)** ChIP-seq heat map  
 818 covering 10 kb regions across H3K79me3 peaks. **(B)** H3K79me3 ChIP-seq signal normalized by input  
 819 sample in the control (blue line) and shKDM2B cells (red line). **(C)** Change in H3K79me3 occupancy  
 820 following KDM2B knockdown. **(D)** Input and H3K79me3 ChIP-seq profiles over two regions of the  
 821 genome in control and shKDM2B cells. Below the sequencing traces, *GATA4* and *PDE3B* genes are  
 822 indicated. **(E)** H3K79me3 mark at *PDE3B* promoter in KDM2B knockdown cells analyzed by ChIP-  
 823 qPCR. **(F)** qRT-PCR analysis for detection of target gene expression. KDM2B was depleted in 293T  
 824 cells. **(G)** ChIP-qPCR analysis for measurement of KDM2B enrichment and H3K79me3 levels on  
 825 target gene promoters. KDM2B was stably knocked down in 293T cells. Promoters of *HOXA7*, *MEIS1*,  
 826 *ALX1*, and *GATA4* were immunoprecipitated and amplified using specific primers.

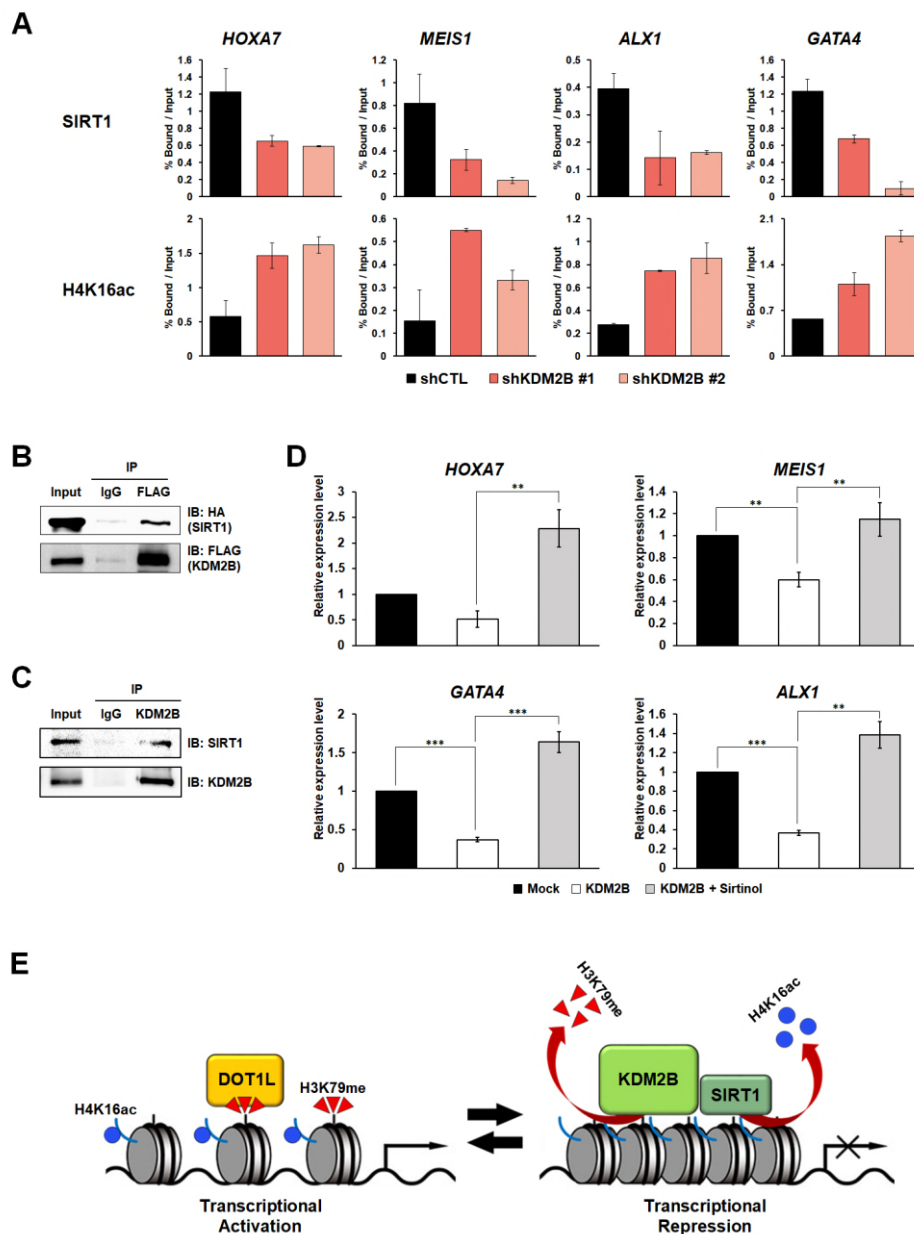

827

828

829 **Figure 6.** KDM2B-mediated H3K79 demethylation induces recruitment of SIRT1 to chromatin. **(A)**  
 830 ChIP analysis was performed using anti-SIRT1 and anti-H4K16ac antibodies in stable KDM2B  
 831 knockdown 293T cells. The immunoprecipitated DNA fragments were analyzed by qRT-PCR from the  
 832 promoter regions of *HOXA7*, *MEIS1*, *ALX1*, and *GATA4*. **(B)** IP of ectopically overexpressed FLAG-  
 833 KDM2B in 293T cells transfected with FLAG-KDM2B and HA-SIRT1. **(C)** IP of endogenous KDM2B in  
 834 293T cells. **(D)** qRT-PCR analysis for detection of target gene expression. 293T cells were treated  
 835 with DMSO or sirtinol for 2 h following KDM2B overexpression. All error bars indicate SEM for at least  
 836 triplicated experiments. **(E)** Proposed model of transcriptional repression of target genes by KDM2B  
 837 via H3K79 demethylation and SIRT1 recruitment.
